24

25 **Abstract**

26           Effective suppression of transposable elements (TEs) is paramount to maintain genomic  
27 integrity and organismal fitness. In *D. melanogaster*, *flamenco* is a master suppressor of TEs,  
28 preventing their movement from somatic ovarian support cells to the germline. It is transcribed  
29 by Pol II as a long (100s of kb), single-stranded, primary transcript, that is metabolized into  
30 Piwi-interacting RNAs (piRNAs) that target active TEs via antisense complementarity. *flamenco*  
31 is thought to operate as a trap, owing to its high content of recent horizontally transferred TEs  
32 that are enriched in antisense orientation. Using newly-generated long read genome data, which  
33 is critical for accurate assembly of repetitive sequences, we find that *flamenco* has undergone  
34 radical transformations in sequence content and even copy number across *simulans* clade  
35 Drosophilid species. *D. simulans flamenco* has duplicated and diverged, and neither copy  
36 exhibits synteny with *D. melanogaster* beyond the core promoter. Moreover, *flamenco*  
37 organization is highly variable across *D. simulans* individuals. Next, we find that *D. simulans*  
38 and *D. mauritiana flamenco* display signatures of a dual-stranded cluster, with ping-pong signals  
39 in the testis and embryo. This is accompanied by increased multicopy elements, consistent with  
40 these regions operating as functional dual stranded clusters. Overall, the physical and functional  
41 diversity of *flamenco* orthologs is testament to the extremely dynamic consequences of TE arms  
42 races on genome organization, not only amongst highly related species, but even amongst  
43 individuals.

44

45

46

## 47 **Introduction**

48 *Drosophila* gonads exemplify two important fronts in the conflict between transposable elements  
49 (TEs) and the host – the germline (which directly generates gametes), and somatic support cells  
50 (from which TEs can invade the germline) (1, 2). The strategies by which TEs are suppressed in  
51 these settings are distinct (3), but share their utilization of piwi-interacting RNAs (piRNAs).  
52 These are ~24-32 nt RNAs that are bound by the PIWI subclass of Argonaute proteins, and guide  
53 them and associated cofactors to targets for transcriptional and/or post-transcriptional silencing  
54 (4–7).

55       Mature piRNAs are processed from non-coding piRNA cluster transcripts, which derive  
56 from genomic regions that are densely populated with TE sequences (7–9). However, the  
57 mechanisms of piRNA biogenesis differ between gonadal cell types. In the germline, piRNA  
58 clusters are transcribed from both DNA strands through non-canonical Pol II activity (6, 10–12),  
59 which is initiated by chromatin marks rather than specific core promoter motifs. Moreover, co-  
60 transcriptional processes such as splicing and polyadenylation are suppressed within dual strand  
61 piRNA clusters (13, 14). On the other hand, in ovarian somatic support cells, piRNA clusters are  
62 transcribed from a typical promoter as a single stranded transcript, which can be alternatively  
63 spliced as with protein-coding mRNAs (15–18). These rules derive in large part from the study  
64 of model piRNA clusters (i.e. the germline *42AB* and somatic *flamenco* piRNA clusters). For  
65 both types, their capacity to repress invading transposable elements is thought to result from  
66 random integration of new transposons into the cluster. As such, piRNA clusters are adaptive  
67 loci that play central roles in the conflict between hosts and TEs.

68       The location and activity of germline piRNA clusters are stochastic and evolutionarily  
69 dynamic, as there are many copies of TE families in different locations that may produce

70 piRNAs (9, 19). By contrast, somatic piRNA clusters are not redundant and a single insertion of  
71 a TE into a somatic piRNA cluster should be sufficient to prevent that TE from further  
72 transposition (18, 20). Thus, *flamenco* should contain only one copy per TE family (18), which is  
73 true in the *flamenco* locus of *D. melanogaster* (18). *flamenco* is also the only piRNA cluster  
74 which produces a phenotypic effect when altered, as germline clusters can be deleted with no  
75 consequences.

76 *flamenco* has been a favored model for understanding the piRNA pathway since the  
77 discovery of piRNA mediated silencing of transposable elements (6). *flamenco* spans >180 kb of  
78 repetitive sequences located in  $\beta$ -heterochromatin of the X chromosome (21). Of note, *flamenco*  
79 was initially identified, prior to the formal recognition of piRNAs, via transposon insertions that  
80 de-repress *gypsy*, *ZAM*, and *Idefix* class elements (21–25). These mutant alleles disrupt the  
81 *flamenco* promoter, and consequently abrogate transcription and piRNA production from this  
82 locus. By contrast, the recent deletion of multiple model germline piRNA clusters, which  
83 eliminate the biogenesis of a bulk of cognate piRNAs, did not de-repress their cognate TEs (9).  
84 Thus, the analysis of *flamenco* evolution is presumably more consequential for TE dynamics.  
85 Analysis of *flamenco* in various strains of *D. melanogaster* supports that this locus traps  
86 horizontally derived TEs to achieve silencing of newly invaded TEs (18). The *flamenco* locus  
87 exhibits synteny across the *D. melanogaster* sub-group (26); however, the sequence composition  
88 of *flamenco* outside *D. melanogaster* has not been well-characterized (27).

89 In this study, we compare the *flamenco* locus across 10 strains of simulans-clade species,  
90 namely *D. simulans*, *D. mauritiana*, and *D. sechellia*. Analysis of piRNAs from ovaries of five  
91 genotypes of *D. simulans* found that *flamenco* is duplicated in *D. simulans*. This duplication is  
92 old enough that there is no sequence synteny across copies, even though their core promoter

93 regions and the adjacent *dip1* gene are conserved. *flamenco* has also been colonized by abundant  
94 (>40) copies of *RI*, a TE that was thought to insert only at ribosomal genes, and to evolve at the  
95 same rate as nuclear genes [21]. Furthermore, between different genotypes, up to 63% of TE  
96 insertions are not shared within any given copy of *flamenco*. Despite this, several full length TEs  
97 are shared between all genotypes in a similar sequence context. This incredible diversity at the  
98 *flamenco* locus, even within a single species, suggests there may be considerable variation in its  
99 ability to suppress transposable elements across individuals.

100 Cross-species comparisons further indicate that functions of *flamenco* have diversified.  
101 Data from *D. sechellia* and *D. melanogaster* conform with the current understanding of *flamenco*  
102 as a uni-strand cluster. However, we find evidence that *D. simulans* and *D. mauritiana* *flamenco*  
103 can act as a dual strand cluster in testis (*D. mauritiana*) and embryos (*D. mauritiana* and *D.*  
104 *simulans*), yielding piRNAs from both strands with a ping pong signal. Overall, we infer that the  
105 rapid evolution of *flamenco* alleles across individuals and species reflects highly adaptive  
106 functions and dynamic biogenesis capacities.

## 107 **Materials and Methods**

### 108 *Fly strains*

109 The four *D. simulans* lines *SZ232*, *SZ45*, *SZ244*, and *SZ129* were collected in California from the  
110 Zuma Organic Orchard in Los Angeles, CA on two consecutive weekends of February 2012 [57–  
111 61]. *LNP-15-062* was collected in Zambia at the Luwangwa National Park by D. Matute and  
112 provided to us by J. Saltz (J. Saltz pers. comm., [41,53]). *MD251*, *MD242*, *NS137*, and *NS40*  
113 were collected in Madagascar and Kenya (respectively) and are described in [50]. The *D.*  
114 *simulans* strain *wxD<sup>1</sup>* was originally collected by M. Green, likely in California, but its

115 provenance has been lost (pers. comm. Jerry Coyne). *D. mauritiana* (*w12*) and *D. sechellia*  
116 (*Rob3c/Tucson 14021-0248.25*) are described in [11].

117 *Long read DNA sequencing and assembly*

118 *MD242*, four SZ lines and *LNP-15-062* were sequenced on a MinION platform at North Dakota  
119 State University (Oxford Nanopore Technologies (ONT), Oxford, GB), with base-calling using  
120 guppy (v4.4.2). *MD242*, the four SZ lines, and *LNP-15-062* were assembled with Canu (v2.1)  
121 [73] and two rounds of polishing with Racon (v1.4.3) [67]. The CA strains were additionally  
122 polished with short reads using Pilon (v1.23) [68](SRR3585779, SRR3585440, SRR3585480,  
123 SRR3585391) [60]. The first *wxD<sup>I-1</sup>* assembly is described here [12]. *MD251*, *NS137*, *NS40* and  
124 *wxD<sup>I-2</sup>* were sequenced on a MinION platform by B. Kim at Stanford University. They were  
125 assembled with Flye [29], and polished with a round of Medaka followed by a round of pilon  
126 [68]. Following this contaminants were removed with blobtools  
127 (<https://zenodo.org/record/845347>, [30]), soft masked with RepeatModeler and Repeatmasker  
128 [22,64], then aligned to the *wxD<sup>I</sup>* as a reference with Progressive Cactus [3]. The assemblies  
129 were finished with reference based scaffolding using Ragout [28]. *D. mauritiana* and *D.*  
130 *sechellia* were sequenced with PacBio and assembled with FALCON using default parameters  
131 (<https://github.com/PacificBiosciences/FALCON>)[11].The *D. melanogaster* assembly is  
132 described here (47). A summary of the assembly statistics is available in Supplementary Table 1.  
133 The quality of cluster assembly was evaluated using CUSCO as described in (19, 48)  
134 (Supplementary File 1).

135 *Short read sequencing and mapping*

136 Short read sequencing was performed by Beijing Genomics Institute (BGI) on approximately 50 dissected  
137 ovaries from adult female flies (*SZ45*, *SZ129*, *SZ232*, *SZ244*, *LNP-15-062*). Short read libraries from 0-2  
138 hour embryos were prepared from *D. melanogaster*, *wxD<sup>I-2</sup>*, *D. sechellia*, and *D. mauritiana* (SRAXXX)

139 (49). Small RNA from testis is described in (50, 51). *D. melanogaster* OSC small RNA libraries were  
140 downloaded from the SRA (SRR11999160). Libraries were filtered for adapter contamination and short  
141 reads between 23-29 bp were retained for mapping with fastp (52). The RNA was then mapped to  
142 their respective genomes using bowtie (v1.2.3) and the following parameters (-q -v 1 -p 1 -S -a -  
143 m 50 --best --strata) (53, 54). The resulting bam files were processed using samtools (55). To  
144 obtain unique reads the bam files were filtered for reads with 1 mapping position. To obtain  
145 counts files with weighted mapping the bam files were processed using Rsubreads and the  
146 featureCounts function (56).

#### 147 *Defining and annotating piRNA clusters*

148 piRNA clusters were defined using proTRAC [52]. piRNA clusters were predicted with a  
149 minimum cluster size of 1 kb (option “-clsize 1000”), a P value for minimum read density of  
150 0.07 (option “-pdens 0.07”), a minimum fraction of normalized reads that have 1T (1U) or 10A  
151 of 0.33 (option “-1Tor10A 0.33”) and rejecting loci if the top 1% of reads account for more than  
152 90% of the normalized piRNA cluster read counts (option “-distr 1-90”), and a minimal fraction  
153 of hits on the main strand of 0.25 (option “-clstrand 0.25”). Note that this ties the piRNA clusters  
154 to their function such that participation in the ping pong pathway can be inferred from these  
155 patterns. Clusters were annotated using RepeatMasker (v. 4.0.7) and the TE libraries described in  
156 Chakraborty et al. (2019) [12,64]. The position of *flamenco* was also evaluated based off of the  
157 position of the putative promoter, the *dip1* gene, and the enrichment of *gypsy* elements [24].  
158 Fragmented annotations were merged to form TE copies with onecodetofindthemall [5].  
159 Fragmented annotations were also manually curated, particularly because TEs not present in the  
160 reference library often have their LTRs and internal sequences classified as different elements.

#### 161 *Aligning the flamenco promoter region*

162 The region around the *flamenco* promotor was extracted from each genotype and species with  
163 bedtools getfasta (61). Sequences were aligned with clustal-omega and converted to nexus  
164 format (62). Trees were built using a GTR substitution model and gamma distributed rate  
165 variation across sites (63). The markov chain monte carlo chains were run until the standard  
166 deviation of split frequencies was below .01, around one million generations. The consensus  
167 trees were generated using sumt conformformat=simple. The resulting trees were displayed with the  
168 R package ape (64).

### 169 *Detecting ping pong signals in the small RNA data*

170 Ping pong signals were detected using pingpongpro [66]. This program detects the presence of  
171 RNA molecules that are offset by 10 nt, such that stacks of piRNA overlap by the first 10 nt from  
172 the 5' end. These stacks are a hallmark of piRNA mediated transposon silencing. The algorithm  
173 also takes into account local coverage and the presence of an adenine at the 10<sup>th</sup> position. The  
174 output includes a z-score between 0 and 1, the higher the z-score the more differentiated the ping  
175 pong stacks are from random local stacks.

## 176 **Results**

### 177 *flamenco in the D. simulans clade*

178 We identified *D. simulans flamenco* from several lines of evidence: piRNA cluster calls from  
179 proTRAC, its location adjacent to divergently transcribed *dip1*, the existence of conserved core  
180 *flamenco* promoter sequences, and enrichment of *gypsy* elements (Figure 1A-D); Supplementary  
181 Table 2). The *flamenco* locus is at least 376 kb in *D. simulans*. This is an expansion compared  
182 with *D. melanogaster*, where *flamenco* is only 156 kb (*Canton-S*). In *D. sechellia flamenco* is  
183 363 kb, however in *D. mauritiana* the locus has expanded to at least 840 kb (Supplementary  
184 Table 2). This is a large expansion, and it is possible that the entire region does not act as the



185 *flamenco* locus. However, evidence that it does include uniquely mapping piRNAs are found  
186 throughout the region and *gypsy* enrichment is consistent with a *flamenco*-like locus  
187 (Supplementary Figure 1). There are no protein coding genes within the region, and while the  
188 neighboring genes on the downstream side of *flamenco* in *D. melanogaster* have moved in *D.*  
189 *mauritiana* (CG40813- CG41562 at 21.5 MB), the following group of genes beginning with  
190 CG14621 is present and flanks *flamenco* as it is annotated. Thus in *D. melanogaster* the borders  
191 of *flamenco* are flanked by *dip1* upstream and CG40813 downstream, while in *D. mauritiana*  
192 they are *dip1* upstream and CG14621 downstream. Between all species the *flamenco* promoter  
193 and surrounding region, including the *dip1* gene, are alignable and conserved (Figure 1E).

194 *Structure of the flamenco locus*

195 *Structure of the flamenco locus*

196 *D. melanogaster flamenco* bears a characteristic structure, in which the majority of TEs  
197 are *gypsy*-class elements in the antisense orientation (79% antisense orientation, 85% of which  
198 are *gypsy* elements) (Figure 1D; Supplementary Table 3). This is true in both the *iso-1* and  
199 *Canton-S* strains. In *D. simulans*, *flamenco* has been colonized by large expansions of *R1*  
200 transposable element repeats such that on average the percent of antisense TEs is only 50% and  
201 the percent of the locus comprised of LTR elements is 55%. However, 76% of antisense  
202 insertions are LTR insertions, thus the underlying *flamenco* structure is apparent when the *R1*  
203 insertions are disregarded (Figure 1D). In *D. mauritiana flamenco* is 71% antisense, and of those  
204 antisense elements it is 85% LTRs. Likewise in *D. sechellia* 78% of elements are antisense, and  
205 of those 81% are LTRs. *flamenco* retains the overall structure of a canonical *D. melanogaster*-  
206 like *flamenco* locus in all of these species, however in *D. simulans* the nature of the locus is  
207 somewhat altered by the abundant *R1* insertions (Figure 1D).

208 *flamenco* is duplicated in *D. simulans*

209 In *D. simulans*, we unexpectedly observed that *flamenco* is duplicated on the X  
210 chromosome; the duplication was confirmed with PCR and a restriction digest (Supplementary  
211 Table 4). These duplications are associated with a conserved copy of the putative *flamenco*  
212 enhancer as well as copies of the *dip1* gene located proximal to *flamenco* in *D. melanogaster*  
213 (Figure 1C, 2A). While it is unclear which copy is orthologous to *D. melanogaster flamenco*, all  
214 *D. simulans* lines bear one copy that aligns across genotypes. We refer to this copy as *D.*  
215 *simulans flamenco*, and the other copies as duplicates. Otherwise, *flamenco* duplicates do not  
216 align with one another and lack synteny amongst their resident TEs. Possible evolutionary  
217 scenarios are that the *flamenco* duplication occurred early in the *simulans* lineage, that the  
218 clustered evolved very rapidly, or that the duplication encompassed only the promoter region and  
219 was subsequently colonized by TEs (Figure 1C, 2A).

220 The *flamenco* duplicate is absent in the *D. simulans* reference strain, *w*<sup>501</sup>, but present in  
221 *wxD*<sup>1</sup>, suggesting it was polymorphic or absent between the collection of these strains (or was  
222 not assembled). The duplicate retains the structure of *flamenco*, with an average of 67% of TEs  
223 in the antisense orientation in the duplication of *flamenco*, and 91% of the TEs in the antisense  
224 orientation are LTRs. The duplicate of *flamenco* is less impacted by *RI*, with some genotypes  
225 having as few as 8 *RI* insertions (Figure 2C).

226 *RI LINE elements at the flamenco locus*

227 *RI* elements are well-known to insert into rDNA genes, are transmitted vertically, and evolve  
228 similarly as the genome background rate [21]. They have also been found outside of rDNA  
229 genes, but only as fragments. However, as mentioned, *RI* elements are abundant within *flamenco*  
230 loci in the *simulans* clade. Outside of *flamenco*, *RI* elements in *D. simulans* are distributed

231 according to expectation, with full length elements occurring only within rDNA (Supplementary  
232 File 6). Within *flamenco*, most copies of *RI* occur as tandem duplicates, creating large islands of  
233 fragmented *RI* copies (Figure 2A). They are on average 3.7% diverged from the reference *RI*  
234 from *D. simulans*. Across individual *D. simulans* genomes, ~99 kb of *flamenco* loci consists of  
235 *RI* elements, fully 26% of their average total length. *SZ45*, *LNP-15-062*, *NS40*, *MD251*, and  
236 *MD242* contain 4-7 full length copies of *RI* in the sense orientation, even though all but *SZ45*  
237 bear fragmented *RI* copies on the antisense strand. (The *SZ45 flamenco* assembly is incomplete).  
238 As the antisense *RI* copies are expected to suppress *RI* transposition, *flamenco* may not suppress  
239 these elements effectively.

240 In *D. mauritiana*, *flamenco* harbors abundant fragments or copies of *RI* (19 on the  
241 reverse strand and 20 on the forward strand), and only one large island of *RI* elements. In total,  
242 *D. mauritiana* contains 84 kb of *RI* sequence within *flamenco*. In *D. mauritiana* there are 8 full  
243 length copies of *RI* at the *flamenco* locus, 7 in antisense, which are not obviously due to a  
244 segmental or local duplication. Finally, we find that *D. sechellia flamenco* lacks full length  
245 copies of *RI*, and it contains only 18 KB of *RI* sequence (16 fragments on the reverse strand).  
246 Yet, all the copies are on the sense strand, which would not produce fragments that can suppress  
247 *RI* TEs. Essentially the antisense copies of *RI* in *D. mauritiana* should be suppressing the TE,  
248 but we see multiple full length antisense insertions, and *D. sechellia* has no antisense copies, but  
249 we see no evidence for recent *RI* insertions. From this it would appear that whatever is  
250 controlling the transposition of *RI* lies outside of *flamenco*.

251 The presence of long sense-strand *RI* elements within *flamenco* is a departure from  
252 expectation [21,72]. There is no evidence of an rDNA gene within the *flamenco* locus that would  
253 explain the insertion of *RI* elements there, nor is there precedence for the large expansion of *RI*

254 fragments within the locus. Furthermore, the suppression of *RI* transposition does not appear to  
255 be controlled by *flamenco*.

### 256 *piRNA production from RI*

257 On average *RI* elements within the *flamenco* locus of *D. simulans* produce more piRNA  
258 than any other TE within *flamenco* (Supplementary Table 6). *RI* reads mapping to the forward  
259 strand constitute an average of 51% of the total piRNAs within the *flamenco* locus from the  
260 maternal fraction, ovary, and testis using weighted mapping. The only exception is the ovarian  
261 sample from *SZ232* which is a large outlier at only 5%. However reads mapping to the reverse  
262 strand account for an average of 84% of the piRNA being produced from the strand in every  
263 genotype and tissue – maternal fraction, testis, or ovary. If unique mapping is considered instead  
264 of weighted these percentages are reduced by approximately 20%, which is to be expected given  
265 that *RI* is present in many repeated copies. Production of piRNA from the reverse strand seems  
266 to be correlated with elements inserted in the sense orientation, of which the vast majority are *RI*  
267 elements in *D. simulans* (Supplementary Figure 2). The production of large quantities of piRNA  
268 cognate to the *RI* element is seemingly pointless – if *RI* only inserts at rDNA genes and are  
269 vertically transmitted there is little reason to be producing the majority of piRNA in response to  
270 this element.

271 In *D. sechellia* there are very few piRNA produced from *flamenco* in these tissues, and  
272 there are no full length copies of *RI*. Likewise overall weighted piRNA production from *RI*  
273 elements on either strand is 2.8-5.9% of the total mapping piRNA. In contrast in *D. mauritiana*  
274 there are full length *RI* elements and abundant piRNA production in the maternal fraction and  
275 testis. In *D. mauritiana* an average of 28% of piRNAs mapping to the forward strand of *flamenco*  
276 are arising from *RI*, and 33% from the reverse strand. In *D. mauritiana* *RI* elements make up a

277 smaller proportion of the total elements in the sense orientation (24%), versus *D. simulans*  
278 (55%).

### 279 *Conservation of flamenco*

280 The *dip1* gene and promoter region adjacent to each copy of *flamenco* are very conserved both  
281 within and between copies of *flamenco* (Figure 2). The phylogenetic tree of the area suggests that  
282 we are correct in labeling the two copies as the original *flamenco* locus and the duplicate (Figure  
283 2). The original *flamenco* locus is more diverged amongst copies while the duplicate clusters  
284 closely together with short branch lengths (Figure 2). They are also conserved and alignable  
285 between *D. melanogaster*, *D. sechellia*, *D. mauritiana*, and *D. simulans* (Figure 1). However, the  
286 same is not true of the *flamenco* locus itself. Approximately 3 kb from the promoter *flamenco*  
287 diverges amongst genotypes and species and is no longer alignable by traditional sequence-based  
288 algorithms, as the TEs are essentially a presence/absence that spans multiple kb. There is no  
289 conservation of *flamenco* between *D. melanogaster*, *D. simulans*, *D. sechellia*, and *D.*  
290 *mauritiana* (Figure 3). However, within the *simulans* clade many of the same TEs occupy the  
291 locus, suggesting that they are the current genomic invaders in each of these species (Figure 3).

292 In *D. simulans* the majority of full length TEs are singletons – 52% in *flamenco* and 64%  
293 in the duplicate. Copies that are full length in one genotype but fragmented in others are counted  
294 as shared, not singletons. Almost half of these singletons in the duplicate are due to a single  
295 genotype with a unique section of sequence, in this case *MD251*. Likewise a third of the  
296 singleton insertions in the duplicate are due to an *NS40* specific region of *flamenco*. Regardless  
297 of these concentrations of singletons in single genotypes, it is the single largest category of  
298 transposable element insertions, followed by fixed insertions. Thus even within a single  
299 population there is considerable diversity at the *flamenco* locus, and subsequently diversity in the

300 ability to suppress transposable elements. For example, *gypsy-29* is present in three genotypes  
301 either in *flamenco* or the duplicate, which would suggest that these genotypes are able to  
302 suppress this transposable element in the somatic support cells of the ovary while the other  
303 genotypes are not. In contrast *gypsy-3* is present in more than one full length copy in *flamenco*  
304 and its duplicate in every genotype but one where it is present in a single copy. There are a  
305 number of these conserved full length TEs that are present in all or nearly all genotypes,  
306 including *Chimpo*, *gypsy-2*, *Tirant*, and *gypsy-4*. In addition, the *INE1* elements adjacent to the  
307 promoter are always conserved.

308         It is notable that any full length TEs are shared across all genotypes, given that *wxD<sup>1</sup>* was  
309 like collected 30-50 years prior to the others, and the collections span continents (Figure 2). Two  
310 facts are relevant to this observation: (1) TEs were shown not correlate with geography [32] and  
311 (2) *D. simulans* is more diverse within populations than between different populations  
312 [38,54,62]. Other explanations are also plausible. Selection could be maintaining these full  
313 length TEs, *wxD<sup>1</sup>* could have had introgression from other lab strains, or a combination of these  
314 explanations.

### 315 *Suppression of TEs by the flamenco locus and the trap model of TE control*

316 In *D. melanogaster*, it was proposed that while germline clusters may have many insertions of a  
317 single TE, the somatic 'master regulator' *flamenco* will have a single insertion of each  
318 transposon, after which they are silenced and no longer able to transpose [72].

319 Here, we evaluate the following lines of evidence to determine if they support the trap model of  
320 transposable element suppression. (1) How many TEs have antisense oriented multicopy  
321 elements within *flamenco*? (2) How many TEs have full length and fragmented insertions,  
322 suggesting the older fragments did not suppress the newer insertion? (3) How many *de novo*

323 insertions of TEs in the *flamenco* duplicate of *D. simulans* are also present in the original  
324 *flamenco* copy?

325 How many TEs have antisense oriented multicopy elements within *flamenco*?

326 Due to the difficulty in classifying degraded elements accurately, for example between multiple  
327 classes of *gypsy* element, we will focus here on full length TEs, suggesting recent transposition.

328 In *D. melanogaster* there are 7 full length elements, none of which are present in more than one  
329 antisense copy. These elements make up 27% of the *flamenco* locus. Full length copies of five of  
330 these elements were also reported previously for other strains of *D. melanogaster* (18)

331 In *D. sechellia* there are 14 full length TEs within the *flamenco* locus, three of which are  
332 present in multiple copies. Two of these, *INE1* and *412*, are likely present due to local  
333 duplication. In particular the *INE1* elements flank the promoter, are in the sense orientation, and  
334 are conserved between *D. sechellia*, *D. mauritiana*, and *D. simulans*. The only element present in  
335 multiple antisense copies is *GTWIN*. Similar to *D. melanogaster* these elements make up 27% of  
336 the *flamenco* locus.

337 *D. mauritiana* contains 22 full length TEs within the *flamenco* locus. Four of these are  
338 present in multiple antisense full length copies – *INE1*, *RI*, *Stalker-4*, and *Cr1a*. While some of  
339 the five antisense copies of *RI* likely originated from local duplications – they are in the same  
340 general region and tend to be flanked by *gypsy-8*, not all of them show these patterns.  
341 Furthermore, as aforementioned, there also are full length sense copies of *RI* suggesting *RI* is  
342 not being suppressed by *flamenco*. *gypsy-12* and *gypsy-3* have a second antisense copy within  
343 *flamenco* that is just below the cutoff to be considered full length – in *gypsy-3* the second copy is  
344 10% smaller, for *gypsy-12* it is 80% present but missing an LTR. Full length TEs make up 19%  
345 of the *flamenco* locus.

346 In *D. simulans* there are 29 full length TEs present in any of the seven complete *flamenco*  
347 assemblies. Eight of these are present in multiple antisense copies within a single genome –  
348 *INE1*, *Chimpo*, *copia*, *gypsy-3*, *gypsy-4*, *412*, *Tirant*, and *BEL-unknown*. The two *Tirant* copies  
349 are likely a segmental duplication as they flank an *RI* repeat region. In addition, most *INE1*  
350 copies are present proximal to the promoter as aforementioned, however in *NS40* a copy is  
351 present in antisense at the end of the locus. *Chimpo* is present in three full length copies within  
352 *MD242 flamenco*, with no evidence of local duplication. While there are no full length copies of  
353 *RI* inserted in antisense, *RI* is present in full length sense copies despite many genomes  
354 containing antisense fragments, suggesting *flamenco* is not suppressing *RI*. On average full  
355 length TEs constitute 20% of *flamenco* in *D. simulans*.

356 In the duplicate of *flamenco* in *D. simulans* there are 30 full length TEs present in any  
357 one of the five complete *flamenco* duplicate assemblies. However, none of them are multicopy in  
358 antisense. However, they are multicopy relative to the original copy of *flamenco*. *gypsy-3*, *BEL-*  
359 *unknown*, *Nomad-1*, *Chimpo*, *gypsy-53A*, *RI*, and *INE1* are all multicopy with respect to the  
360 original *flamenco* within a given genome. Some of these may have been inherited at the time of  
361 duplication, however are full length in both copies suggesting recent transposition. In the  
362 duplicate of *flamenco* full length TEs occupy an average of 17% of the locus. *MD251* is an  
363 exception which weights the average, with 28% of the locus, while between 10 and 15% is found  
364 for the remaining copies. Thus *D. simulans* and *D. mauritiana* overall do not meet the  
365 expectation that *flamenco* will contain a single insertion of any given TE.

366 How many TEs have full length and fragmented insertions?



367 Full length elements are younger insertions than fragmented insertions. If a full length element is  
368 inserted in *flamenco* and there are fragments in the antisense orientation elsewhere in *flamenco*  
369 this indicates that *flamenco* did not successfully suppress the transposition of this element.

370 In *D. melanogaster* two elements have fragments in antisense and a full length TE – *Doc*  
371 and *Stalker-2*. *D. sechellia* has 9 elements that are present as a full length TE and a fragment in  
372 antisense (including *412*, *GTWIN*, *mdg-1*, and *nomad*) and 6 that are multicopy that are due to a  
373 solo LTR (including *blood*, *297*, and *Stalker-4*). *D. mauritiana* has 21 elements that are present  
374 in full length and a fragment in antisense (including *blood*, *412*, *gypsy-10-13*, and *R1*), and four  
375 elements that are multicopy due to a solo LTR (*mdg-1*, *Idefix*, and *gypsy-7,10*).

376 In *D. simulans*, TEs that fit this criteria in *flamenco* include *gypsy-2*, *gypsy-3*, *gypsy-4*,  
377 *gypsy-5*, *Chimpo*, *412*, *INE1*, *R1*, *Tirant*, and *Zam*. *297* and *Nomad-1* are present in full length  
378 copies but only multi-copy in the context of solo LTRs. In the duplicate of *flamenco* in *D.*  
379 *simulans* this includes *gypsy-2*, *gypsy-3*, *gypsy-5*, *297*, *Stalker-4*, and *R1*. For example in *NS40*  
380 there are 7 full length copies of *R1* in the sense orientation that likely duplicated in place, as well  
381 as 12 partial copies in the antisense orientation. In the *simulans* clade either fragments of TEs are  
382 not sufficient to suppress transposable elements or some elements are able to transpose despite  
383 the hosts efforts to suppress them.

384 *Is flamenco a trap for TEs entering through horizontal transfer?*

385 High sequence similarity between TEs in different species suggests horizontal transfer [36].

386 However, because sequence similarity can also exist due to vertical transmission we will use

387 sequence similarity between *R1* elements (inserted at rDNA genes) as a baseline for

388 differentiating horizontal versus vertical transfer. There has never been any evidence found for

389 horizontal transfer of *R1* and it is thought to evolve at the same rate as nuclear genes in the

390 *melanogaster* subgroup [21,72]. Of the full length elements present in any genome at *flamenco*  
391 62% of them appear to have originated from horizontal transfer. This is similar to previous  
392 estimates for *D. melanogaster* in other studies [72]. Transfer appears to have occurred primarily  
393 between *D. melanogaster*, *D. sechellia*, and *D. willistoni*. This includes some known horizontal  
394 transfer events such as *Chimpo* and *Chouto* [7], and others which have not been recorded such as  
395 *gypys-29* (*D. willistoni*) and the *Max-element* (*D. sechellia*) (Supplemental File 3). The duplicate  
396 of *flamenco* is similar, with 53% of full length TEs originating from horizontal transfer. They are  
397 many of the same TEs, with a 46% overlap, thus *flamenco* and its duplicate are trapping many of  
398 the same TEs. Both *flamenco* and the duplicate the region appears to serve as a trap for TEs  
399 originating from horizontal transfer.

400 In *D. melanogaster* 85% of full length TEs appear to have arisen through horizontal  
401 transfer, primarily with *D. yakuba* and *D. sechellia* [72]. In *D. sechellia* 53% of full length TEs  
402 have arisen from horizontal transfer, including some known to have moved by horizontal transfer  
403 such as *GTWIN* (*D. melanogaster/D. erecta*) [7]. *D. mauritiana* has 68% of its full length TEs  
404 showing a closer relationship than expected by vertical descent with TEs from *D. sechellia*, *D.*  
405 *melanogaster*, and *D. simulans*. The hypothesis that *flamenco* serves as a trap for TEs entering  
406 the population through horizontal transfer holds throughout the *simulans* clade.

407 *Flamenco piRNA is expressed in the testis and the maternal fraction*

408 Canonically, *flamenco* piRNA is expressed in the somatic follicular cells of the ovary and  
409 not in the germline, and also does not produce a ping pong signal [46]. It was not thought to be  
410 present in the maternal fraction of piRNAs or other tissues. However, that appears to be variable  
411 in different species (Figure 4). We examined single mapping reads in the *flamenco* region from  
412 testes and embryos (maternal fraction) in *D. simulans*, *D. mauritiana*, *D. sechellia*, and *D.*

413 *melanogaster*. As a control we also included *D. melanogaster* ovarian somatic cells, where Aub  
414 and Ago3 are not expressed and therefore there should be no ping pong signals. In *D. simulans*  
415 and *D. mauritiana flamenco* is expressed bidirectionally in the maternal fraction and the testis,  
416 including ping pong signals on both strands (Figure 4; Supplementary Figure 1). In *D. sechellia*,  
417 there is no expression of *flamenco* in either of these tissues. Discarding multimappers in the  
418 maternal fraction 63% (*D. mauritiana*) – 36% (*D. simulans*) of the ping pong signatures on the X  
419 with a z-score of at least 0.9 are located within *flamenco* (Figure 4). In the testis the picture is  
420 more complicated – in *D. mauritiana* 50% of ping pong signals on the X with a z-score of at  
421 least 0.9 are located within *flamenco*, which amounts to a substantial ping pong signature  
422 (Supplementary Figure 1). While mapping of piRNA to both strands was observed in *D.*  
423 *simulans* testis, there is very little apparent ping pong activity (5 positions in *flamenco*  $z > 0.9$ ;  
424 15 potential ping pong signals on the X). In *D. melanogaster*, there is uni-strand expression in  
425 the maternal fraction, but it is limited to the region close to the promoter. In *D. melanogaster* no  
426 ping pong signals have a z-score above 0.8 in the maternal fraction or the ovarian somatic cells.  
427 There are ping pong stacks in *flamenco* in the testis of *D. melanogaster* (2% of the total on the  
428 contig), however they are limited to a single region and are not abundant enough to be strong  
429 evidence of ping activity.

430 In the duplicate of *flamenco* in the maternal fraction 15% of the ping pong signals with a  
431 z-score above 0.9 on the X are within the *flamenco* duplicate. The *flamenco* duplicate does not  
432 have a strong signal of the ping pong pathway in the testis. In addition, *flamenco* in these species  
433 has been colonized by full length TEs thought to be germline TEs such as *blood*, *burdock*, *mdg-*  
434 *3*, *Transpac*, and *Bel* [16,20]. *blood* is also present in *D. melanogaster* in a full length copy while  
435 there is no evidence of germline activity for *flamenco* in *D. melanogaster*, though no other

436 putative germline TEs are present. The differences in ping pong signals between species and the  
437 presence of germline TEs in *D. simulans* and *D. mauritiana* suggests that the role of *flamenco* in  
438 these tissues has evolved between species.

## 439 **Discussion**

440 The piRNA pathway is the organisms primary mechanism of transposon suppression.  
441 While the piRNA pathway is conserved, the regions of the genome that produce piRNA are  
442 labile, particularly in double stranded germline piRNA clusters [23]. The necessity of any single  
443 cluster for TE suppression in the germline piRNA pathway is unclear, but likely redundant [23].  
444 However, *flamenco* is thought to be the master regulator of the somatic support cells of the  
445 ovary, preventing *gypsy* elements from hopping into germline cells [19,42,45,46,48,72]. It is not  
446 redundant to other clusters, and insertion of a single element into *flamenco* in *D. melanogaster* is  
447 sufficient to initiate silencing. Here we show that the function of *flamenco* appears to have  
448 diversified in the *D. simulans* clade, acting in at least some tissues as a germline piRNA cluster.

### 449 *Dual stranded expression of flamenco*

450 In this work, we showed that piRNAs of the *flamenco* locus in *D. simulans* and *D.*  
451 *mauritiana* are deposited maternally, align to both strands, and exhibit ping-pong signatures.  
452 This is in contrast to *D. melanogaster*, where *flamenco* acts as a uni-strand cluster in the soma  
453 [40], our data thus suggest that the *flamenco* locus in *D. simulans* and *D. mauritiana* acts as a  
454 dual-strand cluster in the germline. In *D. sechellia* the attributes of *flamenco* uncovered in *D.*  
455 *melanogaster* appear to be conserved – no expression in the maternal fraction and the testis and  
456 no ping pong signals. Given that *flamenco* is likely a somatic uni-strand cluster in *D. erecta*, we  
457 speculate that the conversion into a germline cluster happened in the *simulans* clade [40]. Such a  
458 conversion of a cluster between the somatic and the germline piRNA pathway is not

459 unprecedented. For example, a single insertion of a reporter transgene triggered the conversion  
460 of the uni-stranded cluster *20A* in *D. melanogaster* into a dual-strand cluster [37].

461         The role of *flamenco* in *D. simulans* and *D. mauritiana* as the master regulator of piRNA  
462 in somatic support cells may still well be true – the promoter region of the *flamenco* cluster is  
463 conserved between species and between copies of *flamenco* within species. This suggests that in  
464 at least some contexts (or all) the cluster is still serving as a uni-strand cluster transcribed from a  
465 traditional RNA Pol II site [24]. However it has acquired additional roles, producing dual strand  
466 piRNA and ping pong signals, in these two species, in at least the germline. However, in *D.*  
467 *simulans*, the majority of these reverse stranded piRNAs are emerging from the *RI* insertions  
468 within *flamenco*. There is no evidence at present that *RI* has undergone an expansion in function  
469 in *D. simulans*, thus it is unclear what, if any, functional impact the reverse stranded piRNAs  
470 have at the *flamenco* locus.

#### 471 *Duplication of flamenco in D. simulans*

472         In *D. simulans*, *flamenco* is present in 2-3 genomic copies, and this duplication is present  
473 in all sequenced *D. simulans* lines. The *dip1* gene and putative *flamenco* promoter flanking the  
474 duplication also has a high similarity in all sequenced lines (Fig. 2B). This raises the possibility  
475 that the duplication of *flamenco* in *D. simulans* was positively selected. Such a duplication may  
476 be beneficial as it increases the ability of an organism to rapidly silence TEs. Individuals with  
477 large piRNA clusters (or duplicated ones) will accumulate fewer deleterious TE insertions than  
478 individuals with small clusters (or non-duplicated ones), and duplicated clusters may therefore  
479 confer a selective advantage [27].

#### 480 *Rapid evolution of piRNA clusters*

481 A previous work showed that dual- and uni-strand clusters evolve rapidly in *Drosophila*  
482 [70]. In agreement with this work we also found that the *flamenco*-locus is rapidly evolving  
483 between and within species (Fig. 1C, 3B). A major open question remains whether this rapid  
484 turnover is driven by selection (positive or negative) or an outcome of neutral processes (eg. high  
485 TE activity or insertion bias of TEs). These rapid evolutionary changes at the *flamenco* locus, a  
486 piRNA master locus, suggest that there is a constant turnover in patterns of piRNA biogenesis  
487 that potentially leads to changes in the level of transposition control between individuals in a  
488 population.

489

490

#### 491 **Funding**

492 This work was supported by the National Science Foundation Established Program to Stimulate  
493 Competitive Research (NSF-EPSCoR-1826834 and NSF-EPSCoR-2032756)  
494 to SS and the Austrian Science Fund FWF (<https://www.fwf.ac.at/>; ) grant P35093 to RK. J.V. was  
495 supported by a Pathway to Independence award from the National Institute of General Medical  
496 Sciences (K99-GM137077). E.C.L. was supported by the National Institute of General Medical  
497 Sciences (R01-GM083300) and National Institutes of Health MSK Core Grant (P30-CA008748).

498

499

500

#### 501 **Competing interests**

502 We declare that we have no competing interests.

503

#### 504 **Acknowledgements**

505 S.S. would like to thank C. & F. & S. Emery for insightful commentary on the manuscript.

506

#### 507 **Authors' contributions**

508 S.S. conceived the study, performed bioinformatics and drafted portions of the manuscript. FW  
509 and RK performed bioinformatics and drafted portions of the manuscript. JV contributed data  
510 and bioinformatic analysis. EL drafted portions of the manuscript and provided data.

511

#### 512 **Availability of data and materials**

513 All data has been made available in the following repositories:

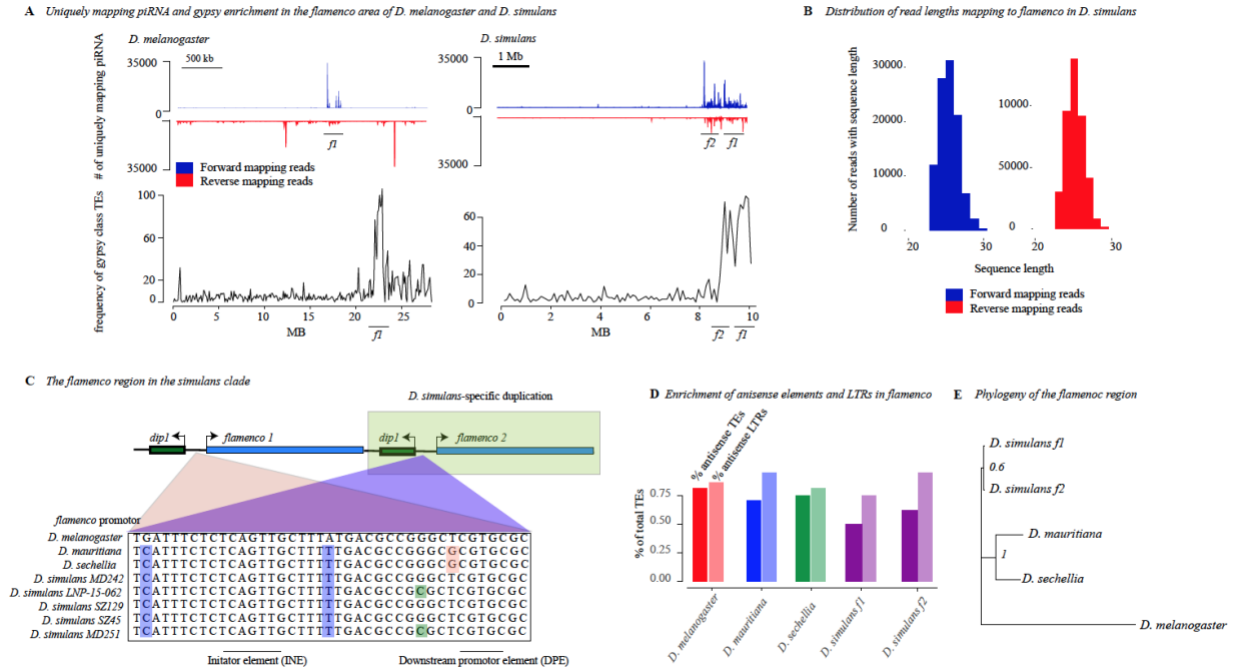

514

515

516 **Figure 1.** A) Unique piRNA from the ovary and gypsy enrichment around *flamenco* and its  
 517 duplicate in *D. simulans* and *D. melanogaster*. piRNA mapping to the entire contig that contains

518 *flamenco* is shown for both species. The top of the panel shows piRNA mapping to *flamenco* and

519 is split by antisense (blue) and sense (red) piRNA. The bottom panel shows the frequency of

520 gypsy-type transposon annotations across the contig containing *flamenco*, counted in 100 kb

521 windows. There is a clear enrichment of gypsy in the area of *flamenco* and, in *D. simulans*, its

522 duplicate compared to the rest of the contig. B) The distribution of read size for small RNA

523 mapping to *flamenco*. The peak is at approximately 26 bp, within the expected range for piRNA.

524 C) The duplication of *flamenco* in the *D. simulans*. Both copies are flanked by the *dip1* gene and

525 copies of the putative *flamenco* promoter. Polymorphisms within the promoter that are shared

526 within the *simulans* clade are shown in blue, *D. simulans* specific polymorphisms are shown in

527 green. The region around the promoter is very conserved across species. D) The percent of TEs

528 in *flamenco* in each species which are in the antisense orientation (first bar) and the percent of

529 TEs in the antisense orientation that are also LTR class elements (second bar). E) A phylogenetic  
 530 tree of the *dip1* and *flamenco* enhancer region for *D. melanogaster* and the *simulans* clade. This  
 531 region is conserved and alignable between all species. The tree was generated with Mr. Bayes  
 532 [51].

533  
 534  
 535  
 536  
 537

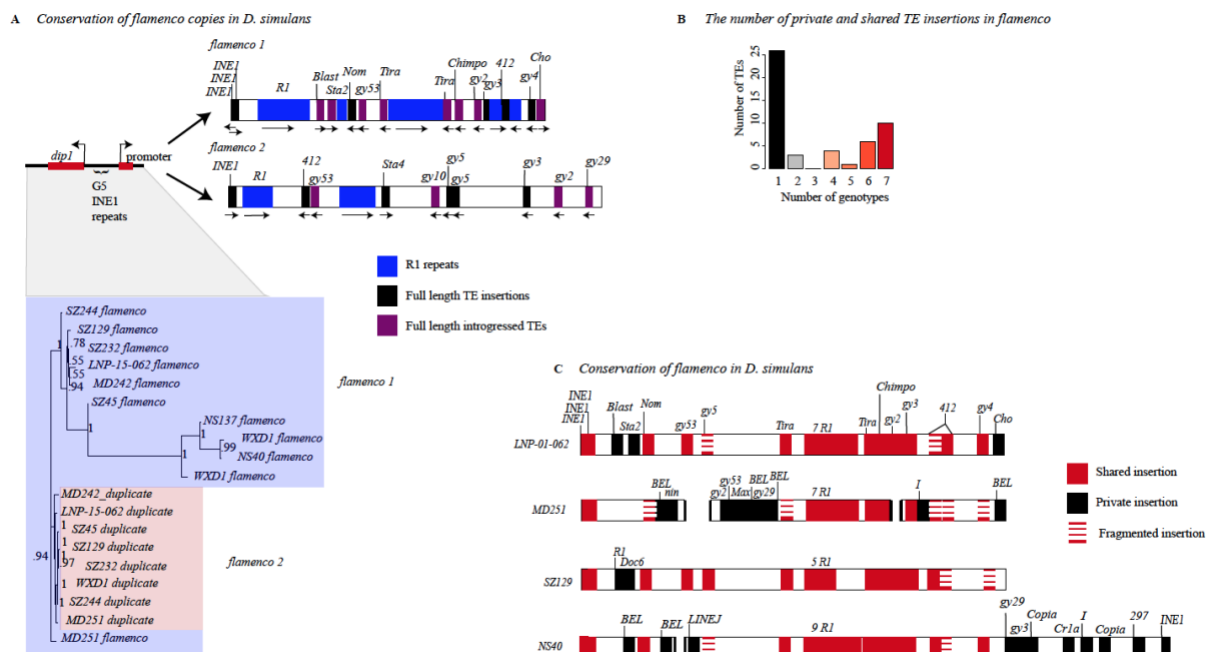

538  
 539  
 540

541  
 542 Figure 2. A) Divergence between copies of flamenco. Proximal is a phylogenetic tree of *dip1* and  
 543 the *flamenco* promoter region from each genome. In between *dip1* and the promoter are a series  
 544 of *G5/INE1* repeats that are found in every genome. Overall this region is fairly conserved, with  
 545 the duplicate copies all grouping together with short branch lengths (shown in pink). The original  
 546 copy of *flamenco* is more diverse with some outliers (shown in light blue) but there is good



547 branch support for all the deep branches of the tree. Distal is a representation of *flamenco* and its  
548 duplicate. R1 repeat regions are shown in blue. Full length transposable elements are labeled.  
549 There is no synteny conservation between *flamenco* and its duplicate. B) The proportion of  
550 insertions that are shared by one through seven genotypes (genotypes with complete *flamenco*  
551 assemblies). C) Divergence of *flamenco* within *D. simulans*. Labeled TEs correspond to  
552 elements which are present in a full length copy in at least one genome. If they are shared  
553 between genomes they are labeled in red, if they are unique they are black. If they are full length  
554 in one genome and degraded in other genomes they are represented by stacked dashes. If they are  
555 present in the majority of genomes but missing in one, it is represented as a missing that TE,  
556 which is agnostic to whether it is a deletion or the element was never present

557

558

**A** Copy number of a subset of TEs in the *simulans* clade

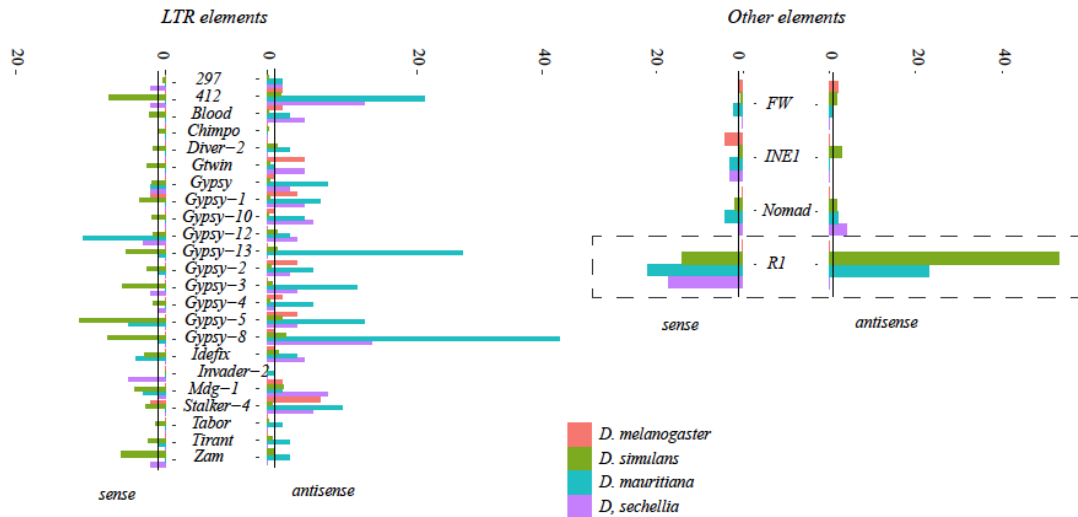

**B** Similarity of TEs in *flamenco* within the *simulans* clade

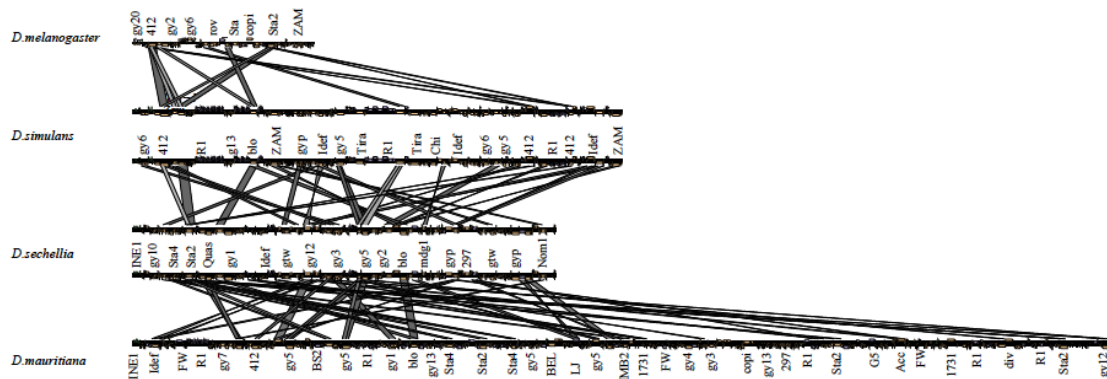

559

560

561

562 **Figure 3)** A. Copy number of a subset of transposable elements at *flamenco*. Solo LTRs are  
 563 indicated by in a lighter shade at the top of the bar. The black line on each bar graph indicates a  
 564 copy number of one. Values for *D. simulans* are the average for all genotypes with a complete  
 565 *flamenco* assembly. Note that in *D. melanogaster* (green) most TEs have a low copy number.  
 566 The expansion of *R1* elements in the *simulans* clade is clearly indicated on the right hand panel  
 567 with a dotted box. Many elements within *flamenco* are multicopy in the *simulans* clade. While  
 568 some of this is likely due to local duplications it is clearly a different pattern than *D.*

569 *melanogaster*. Enrichment of LTR elements on the antisense strand is clear for all species. **B.**  
 570 Alignment of *flamenco* in *D. melanogaster*, *D. simulans*, *D. sechellia*, and *D. mauritiana*. There  
 571 is no conserved synteny between species but there are clearly shared TEs, particularly within the  
 572 *simulans* clade. The expansion of *D. mauritiana* compared to the other species is apparent.

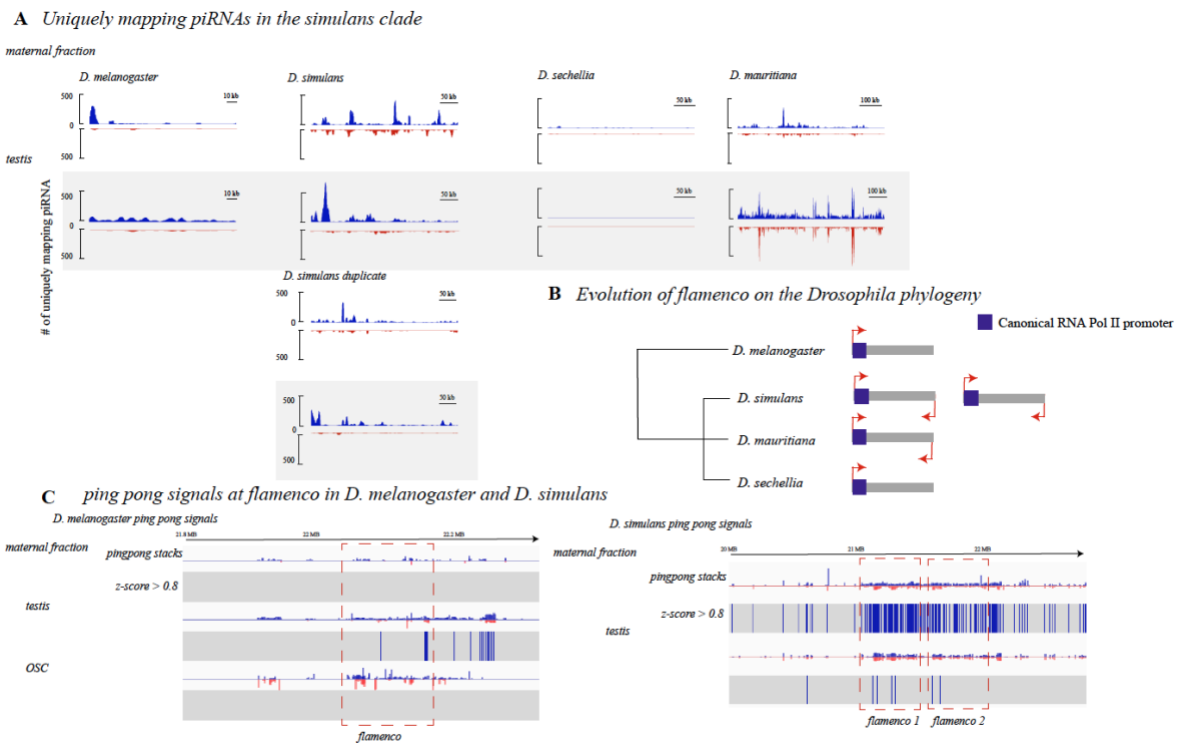

573 -  
 574 -  
 575 -  
 576 **Figure 4) A.** Expression of single mapping piRNAs in the maternal fraction and testis (gray) of  
 577 *D. melanogaster* and the *simulans* clade. Antisense mapping reads are shown in blue, sense in  
 578 red. Libraries are RPM normalized and scaled across library type. *D. sechellia* has no expression  
 579 of *flamenco* in the maternal fraction or the testis. *D. melanogaster* has low expression in the  
 580 maternal fraction and very little ping pong activity. *D. simulans* and *D. mauritiana* show dual  
 581 stranded expression in the testis and maternal fraction. **B.** A schematic of the evolution of  
 582 *flamenco* and its mode expression in the *simulans* and *melanogaster* clade. **C.** The height of 10  
 583 nt pingpong stacks at *flamenco* in *D. melanogaster* maternal fraction, testis and ovarian somatic

584 cells is shown on the left. Below each schematic of the height of the stacks is the position of z-  
585 scores over 0.8, indicating the likelihood that this is a real ping pong signal as opposed to an  
586 artifact. In the testis a few ping pong signals reach this threshold but not enough to indicate  
587 convincingly that there is ping pong activity. On the right are the ping pong stacks and z-scores  
588 for the maternal fraction and testis in *D. simulans*. Only in the maternal fraction are the density  
589 of z-scores over 0.8 convincing enough to indicate an active ping pong cycle in the *flamenco*  
590 region. However, the presence of stacks is enriched in testis, thus this may warrant further  
591 investigation. *D. mauritiana* also has convincing ping pong signals in this region (Supplementary  
592 Figure 1).

593

594

595

596

597 1. C. Duc, *et al.*, Trapping a somatic endogenous retrovirus into a germline piRNA cluster  
598 immunizes the germline against further invasion. *Genome Biol* 20, 127 (2019).

599 2. B. Barckmann, *et al.*, The somatic piRNA pathway controls germline transposition over  
600 generations. *Nucleic Acids Res* 46, gky761- (2018).

601 3. C. D. Malone, *et al.*, Specialized piRNA Pathways Act in Germline and Somatic Tissues of  
602 the *Drosophila* Ovary. *Cell* 137, 522–535 (2009).

603 4. L. S. Gunawardane, *et al.*, A Slicer-Mediated Mechanism for Repeat-Associated siRNA 5'  
604 End Formation in *Drosophila*. *Science* 315, 1587–1590 (2007).

605 5. S. H. Wang, S. C. R. Elgin, *Drosophila* Piwi functions downstream of piRNA production  
606 mediating a chromatin-based transposon silencing mechanism in female germ line. *Proc*  
607 *National Acad Sci* 108, 21164–21169 (2011).

608 6. J. Brennecke, *et al.*, Discrete Small RNA-Generating Loci as Master Regulators of Transposon  
609 Activity in *Drosophila*. *Cell* 128, 1089–1103 (2007).

610 7. A. A. Aravin, *et al.*, The Small RNA Profile during *Drosophila melanogaster* Development.  
611 *Developmental Cell* 5, 337–350 (2003).

- 612 8. G. Chirn, *et al.*, Conserved piRNA Expression from a Distinct Set of piRNA Cluster Loci in  
613 Eutherian Mammals. *Plos Genet* 11, e1005652 (2015).
- 614 9. D. Gebert, *et al.*, Large Drosophila germline piRNA clusters are evolutionarily labile and  
615 dispensable for transposon regulation. *Mol Cell* 81, 3965-3978.e5 (2021).
- 616 10. P. R. Andersen, L. Tirian, M. Vunjak, J. Brennecke, A heterochromatin-dependent  
617 transcription machinery drives piRNA expression. *Nature* 549, 54–59 (2017).
- 618 11. C. Klattenhoff, *et al.*, The Drosophila HP1 Homolog Rhino Is Required for Transposon  
619 Silencing and piRNA Production by Dual-Strand Clusters. *Cell* 138, 1137–1149 (2009).
- 620 12. F. Mohn, G. Sienski, D. Handler, J. Brennecke, The Rhino-Deadlock-Cutoff Complex  
621 Licenses Noncanonical Transcription of Dual-Strand piRNA Clusters in Drosophila. *Cell* 157,  
622 1364–1379 (2014).
- 623 13. Y.-C. A. Chen, *et al.*, Cutoff Suppresses RNA Polymerase II Termination to Ensure  
624 Expression of piRNA Precursors. *Mol Cell* 63, 97–109 (2016).
- 625 14. F. Mohn, G. Sienski, D. Handler, J. Brennecke, The Rhino-Deadlock-Cutoff Complex  
626 Licenses Noncanonical Transcription of Dual-Strand piRNA Clusters in Drosophila. *Cell* 157,  
627 1364–1379 (2014).
- 628 15. C. Goriaux, S. Dasset, Y. Renaud, C. Vaury, E. Brasset, Transcriptional properties and  
629 splicing of the flamencopi RNAcluster. *EMBO reports* 15, 411–418 (2014).
- 630 16. G. Sienski, D. Dönertas, J. Brennecke, Transcriptional Silencing of Transposons by Piwi and  
631 Maelstrom and Its Impact on Chromatin State and Gene Expression. *Cell* 151, 964–980 (2012).
- 632 17. C. Dennis, E. Brasset, C. Vaury, flam piRNA precursors channel from the nucleus to the  
633 cytoplasm in a temporally regulated manner along Drosophila oogenesis. *Mobile DNA* 10, 203–9  
634 (2019).
- 635 18. V. Zanni, A. Eymery, M. C. P. of the, 2013, Distribution, evolution, and diversity of  
636 retrotransposons at the flamenco locus reflect the regulatory properties of piRNA clusters.  
637 *National Acad Sciences* <https://doi.org/10.1073/pnas.1313677110/-/dcsupplemental>.
- 638 19. F. Wierzbicki, R. Kofler, S. Signor, Evolutionary dynamics of piRNA clusters in Drosophila.  
639 *Mol Ecol* (2021) <https://doi.org/10.1111/mec.16311>.
- 640 20. C. M. Bergman, H. Quesneville, D. Anxolabéhère, M. Ashburner, Recurrent insertion and  
641 duplication generate networks of transposable element sequences in the Drosophila melanogaster  
642 genome. *Genome Biology* 7, R112-21 (2006).
- 643 21. N. Prud'homme, M. Gans, M. Masson, C. Terzian, A. Bucheton, Flamenco, a gene  
644 controlling the gypsy retrovirus of Drosophila melanogaster. *Genetics* 139, 697–711 (1995).

- 645 22. S. U. Song, T. Gerasimova, M. Kurkulos, J. D. Boeke, V. G. Corces, An env-like protein  
646 encoded by a Drosophila retroelement: evidence that gypsy is an infectious retrovirus. *Genes &*  
647 *development* 8, 2046–2057 (1994).
- 648 23. M. Mével-Ninio, A. Pelisson, J. Kinder, A. R. Campos, A. Bucheton, The flamenco Locus  
649 Controls the gypsy and ZAM Retroviruses and Is Required for Drosophila Oogenesis. *Genetics*  
650 175, 1615–1624 (2007).
- 651 24. A. Pelisson, *et al.*, Gypsy transposition correlates with the production of a retroviral  
652 envelope-like protein under the tissue-specific control of the Drosophila flamenco gene. *The*  
653 *EMBO Journal* 13, 4401–4411 (1995).
- 654 25. A. Bucheton, The relationship between the flamenco gene and gypsy in Drosophila: how to  
655 tame a retrovirus. *Trends Genet* 11, 349–353 (1995).
- 656 26. C. D. Malone, G. J. Hannon, Molecular Evolution of piRNA and Transposon Control  
657 Pathways in Drosophila. *Cold Spring Harbor Symposia on Quantitative Biology* 74, 225–234  
658 (2010).
- 659 27. A. G. Clark, *et al.*, Evolution of genes and genomes on the Drosophila phylogeny. *Nature*  
660 450, 203–218 (2007).
- 661 28. D. G. Eickbush, W. C. Lathe, M. P. Francino, T. H. Eickbush, R1 and R2 retrotransposable  
662 elements of Drosophila evolve at rates similar to those of nuclear genes. *Genetics* 139, 685–695  
663 (1995).
- 664 29. S. A. Signor, F. N. New, S. Nuzhdin, A Large Panel of Drosophila simulans Reveals an  
665 Abundance of Common Variants. *Genome Biology and Evolution* 10, 189–206 (2017).
- 666 30. S. Signor, S. Nuzhdin, Dynamic changes in gene expression and alternative splicing mediate  
667 the response to acute alcohol exposure in Drosophila melanogaster. *Heredity* (2018).
- 668 31. S. Signor, Population genomics of Wolbachia and mtDNA in Drosophila simulans from  
669 California. *Scientific Reports*, 1–11 (2017).
- 670 32. S. A. Signor, M. Abbasi, P. Marjoram, S. V. Nuzhdin, Social effects for locomotion vary  
671 between environments in Drosophila melanogaster females. *Evolution* 71, 1765–1775 (2017).
- 672 33. S. Signor, Transposable elements in individual genotypes of Drosophila simulans. *Ecology*  
673 *and Evolution* 130, 499–11 (2020).
- 674 34. D. R. Matute, J. Gavin-Smyth, G. Liu, Variable post-zygotic isolation in Drosophila  
675 melanogaster/D. simulanshybrids. *Journal of Evolutionary Biology* 27, 1691–1705 (2014).

- 676 35. D. R. Schrider, J. Ayroles, D. R. Matute, A. D. Kern, Supervised machine learning reveals  
677 introgressed loci in the genomes of *Drosophila simulans* and *D. sechellia*. *PLoS Genetics* 14,  
678 e1007341-29 (2018).
- 679 36. R. L. Rogers, *et al.*, Landscape of Standing Variation for Tandem Duplications in *Drosophila*  
680 *yakuba* and *Drosophila simulans*. *Molecular Biology and Evolution* 31, 1750–1766 (2014).
- 681 37. M. Chakraborty, *et al.*, Evolution of genome structure in the *Drosophila simulans* species  
682 complex. *Genome Res.* 30, 1067–63 (2020).
- 683 38. , *Genome Res.* 2017-Koren-gr.215087.116.
- 684 39. R. Vaser, I. Sović, N. Nagarajan, M. Šikić, Fast and accurate de novo genome assembly from  
685 long uncorrected reads. *Genome Res* 27, 737–746 (2017).
- 686 40. B. J. Walker, *et al.*, Pilon: An Integrated Tool for Comprehensive Microbial Variant  
687 Detection and Genome Assembly Improvement. *Plos One* 9, e112963 (2014).
- 688 41. M. Kolmogorov, J. Yuan, Y. Lin, P. A. Pevzner, Assembly of long, error-prone reads using  
689 repeat graphs. *Nat Biotechnol* 37, 540–546 (2019).
- 690 42. D. R. Laetsch, M. L. Blaxter, BlobTools: Interrogation of genome assemblies.  
691 *F1000research* 6, 1287 (2017).
- 692 43. M. Tarailo-Graovac, N. Chen, Using RepeatMasker to Identify Repetitive Elements in  
693 Genomic Sequences. *Current Protocols in Bioinformatics*, 1–14 (2009).
- 694 44. J. M. Flynn, *et al.*, RepeatModeler2 for automated genomic discovery of transposable  
695 element families. *Proc National Acad Sci* 117, 9451–9457 (2020).
- 696 45. J. Armstrong, *et al.*, Progressive Cactus is a multiple-genome aligner for the thousand-  
697 genome era. *Nature* 587, 246–251 (2020).
- 698 46. M. Kolmogorov, *et al.*, Chromosome assembly of large and complex genomes using multiple  
699 references. *Genome Res* 28, 1720–1732 (2018).
- 700 47. F. Wierzbicki, F. Schwarz, O. Cannalunga, R. Kofler, Generating high quality assemblies for  
701 genomic analysis of transposable elements. *Biorxiv*, 2020.03.27.011312 (2020).
- 702 48. F. Wierzbicki, F. Schwarz, O. Cannalunga, R. Kofler, Novel quality metrics allow  
703 identifying and generating high-quality assemblies of piRNA clusters. *Mol Ecol Resour* 22, 102–  
704 121 (2022).
- 705 49. Vedanayagam, Jeffrey, “Evolutionary Genomics of piRNA Mediated Transposon Silencing  
706 in *Drosophila*,” University of Rochester. (2016).

- 707 50. J. Vedanayagam, *et al.*, Endogenous RNAi silences a burgeoning sex chromosome arms race.  
708 *Biorxiv*, 2022.08.22.504821 (2022).
- 709 51. J. Vedanayagam, C.-J. Lin, E. C. Lai, Rapid evolutionary dynamics of an expanding family  
710 of meiotic drive factors and their hpRNA suppressors. *Nat Ecol Evol* 5, 1613–1623 (2021).
- 711 52. S. Chen, Y. Zhou, Y. Chen, J. Gu, fastp: an ultra-fast all-in-one FASTQ preprocessor.  
712 *Biorxiv*, 274100 (2018).
- 713 53. M. J. Axtell, ShortStack: Comprehensive annotation and quantification of small RNA genes.  
714 *RNA* 19, 740–751 (2013).
- 715 54. B. Langmead, C. Trapnell, M. Pop, S. L. Salzberg, Ultrafast and memory-efficient alignment  
716 of short DNA sequences to the human genome. *Genome Biol* 10, R25 (2009).
- 717 55. H. Li, *et al.*, The Sequence Alignment/Map format and SAMtools. *Bioinformatics* 25, 2078–  
718 2079 (2009).
- 719 56. Y. Liao, G. K. Smyth, W. Shi, The R package Rsubread is easier, faster, cheaper and better  
720 for alignment and quantification of RNA sequencing reads. *Nucleic Acids Res* 47, gkz114-  
721 (2019).
- 722 57. H. Li, Minimap2: pairwise alignment for nucleotide sequences. *Genome Biology* 34, 3094–  
723 3100.
- 724 58. D. Rosenkranz, H. Zischler, proTRAC - a software for probabilistic piRNA cluster detection,  
725 visualization and analysis. *Bmc Bioinformatics* 13, 5 (2012).
- 726 59. M. Chakraborty, J. J. Emerson, S. J. Macdonald, A. D. Long, Structural variants exhibit  
727 widespread allelic heterogeneity and shape variation in complex traits. *Nature Communications*,  
728 1–11 (2019).
- 729 60. M. Bailly-Bechet, A. Haudry, E. Lerat, “One code to find them all”: a perl tool to  
730 conveniently parse RepeatMasker output files. *Mobile Dna-uk* 5, 13 (2014).
- 731 61. A. R. Quinlan, I. M. Hall, BEDTools: a flexible suite of utilities for comparing genomic  
732 features. *Bioinformatics* 26, 841–842 (2010).
- 733 62. F. Sievers, D. G. Higgins, Clustal Omega for making accurate alignments of many protein  
734 sequences. *Protein Sci* 27, 135–145 (2018).
- 735 63. F. Ronquist, *et al.*, MrBayes 3.2: Efficient Bayesian Phylogenetic Inference and Model  
736 Choice Across a Large Model Space. *Systematic Biology* 61, 539–542 (2012).
- 737 64. E. Paradis, J. Claude, K. Strimmer, APE: Analyses of Phylogenetics and Evolution in R  
738 language. *Bioinformatics* 20, 289–290 (2004).



- 739 65. S. Uhrig, H. Klein, PingPongPro: a tool for the detection of piRNA-mediated transposon-  
740 silencing in small RNA-Seq data. *Bioinformatics* 35, 335–336 (2018).
- 741 66. E. Lerat, *et al.*, Population specific dynamics and selection patterns of transposable element  
742 insertions in European natural populations. *Molecular Ecology*, 1–42 (2018).
- 743 67. R. S. Singh, Population genetics and evolution of species related to *Drosophila melanogaster*.  
744 *Annual Review of Genetics* 23, 425–453 (1989).
- 745 68. H. E. Machado, *et al.*, Comparative population genomics of latitudinal variation in  
746 *Drosophila simulans* and *Drosophila melanogaster*. *Molecular Ecology* 25, 723–740 (2016).
- 747 69. A. Sedghifar, P. Saelao, D. J. Begun, Genomic patterns of geographic differentiation in  
748 *Drosophila simulans*. *Genetics* (2016) <https://doi.org/10.1534/genetics.115.185496>.
- 749 70. D. A. Petrov, DNA loss and evolution of genome size in *Drosophila*. *Genetica* 115, 81–91  
750 (2002).
- 751 71. E. L. S. Loreto, C. M. A. Carareto, P. Capy, Revisiting horizontal transfer of transposable  
752 elements in *Drosophila*. *Heredity* 100, 545–554 (2008).
- 753 72. N. Bargues, E. Lerat, Evolutionary history of LTR-retrotransposons among 20 *Drosophila*  
754 species. *Mobile Dna-uk* 8, 7 (2017).
- 755 73. Z. Durdevic, R. S. Pillai, A. Ephrussi, Transposon silencing in the *Drosophila* female  
756 germline is essential for genome stability in progeny embryos. *Life Sci Alliance* 1, e201800179  
757 (2018).
- 758 74. B. Czech, J. B. Preall, J. McGinn, G. J. Hannon, A Transcriptome-wide RNAi Screen in the  
759 *Drosophila* Ovary Reveals Factors of the Germline piRNA Pathway. *Mol Cell* 50, 749–761  
760 (2013).
- 761 75. G. Coline, E. Théron, E. Brassat, C. Vaury, History of the discovery of a master locus  
762 producing piRNAs: the flamenco/COM locus in *Drosophila melanogaster*. *Frontiers Genetics* 5,  
763 257 (2014).
- 764 76. R. Kofler, Dynamics of Transposable Element Invasions with piRNA Clusters. *Molecular*  
765 *Biology and Evolution* 36, 1457–1472 (2019).
- 766 77. A. and T. Péllisson, About the origin of retroviruses and the co-evolution of the gypsy  
767 retrovirus with the *Drosophila* flamenco host gene. 29–37 (1997).
- 768 78. C. Duc, *et al.*, Trapping a somatic endogenous retrovirus into a germline piRNA cluster  
769 immunizes the germline against further invasion. *Genome Biol* 20, 127 (2019).

- 770 79. Y. Luo, P. He, N. Kanrar, K. F. Toth, A. Aravin, Maternally inherited siRNAs initiate piRNA  
771 cluster formation <https://doi.org/10.1101/2022.02.08.479612>.
- 772 80. R. Kofler, piRNA Clusters Need a Minimum Size to Control Transposable Element  
773 Invasions. *Genome Biology and Evolution* 12, 736–749 (2020).
- 774 81. F. K. Teixeira, *et al.*, piRNA-mediated regulation of transposon alternative splicing in the  
775 soma and germ line. *Nature* 552, 268–272 (2017).
- 776 82. V. V. Kapitonov, J. Jurka, Molecular paleontology of transposable elements in the  
777 *Drosophila melanogaster* genome. *Proc National Acad Sci* 100, 6569–6574 (2003).
- 778 83. N. D. Singh, D. A. Petrov, Rapid Sequence Turnover at an Intergenic Locus in *Drosophila*.  
779 *Mol Biol Evol* 21, 670–680 (2004).
- 780
